# Supplementary material for: Electrospinning of ultrafine metal oxide/carbon and metal carbide/carbon nanocomposite fibers
Source: Royal Society of Chemistry journal article supplement (doi:10.1039/c5ra05409e), 2015-01-01
Supplement: c5ra05409e1.pdf [file c5ra05409e1.pdf]

## Supporting information

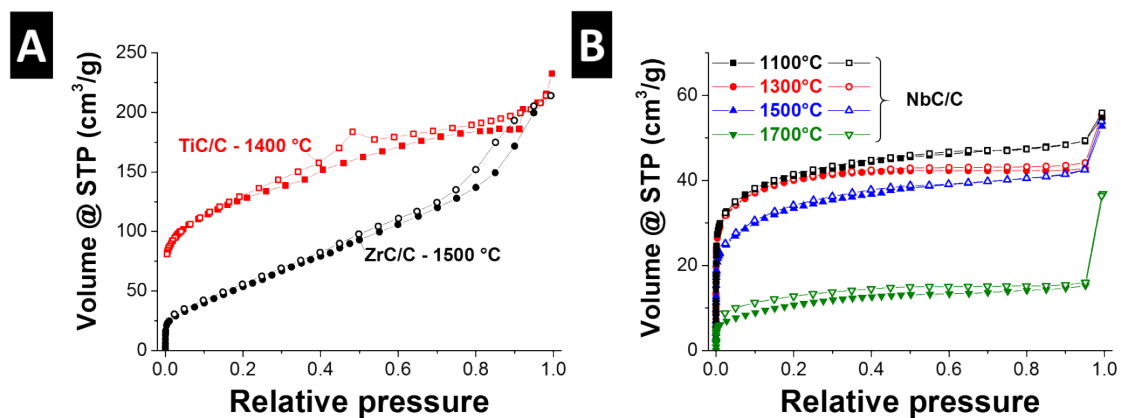

**Fig. S1** Isotherms measured using nitrogen gas sorption analysis of (A) TiC/C synthesized at 1400 °C and ZrC/C synthesized at 1500 °C. (B) Isotherms for NbC/C annealed at different temperatures. STP = standard temperature and pressure. Filled symbols = adsorption; open symbols = desorption.
